# Supplementary material for: Social exclusion and psychopathology in an online cohort of Moroccan-Dutch migrants: Results of the MEDINA-study
Source: PubMed Central journal article supplement (PMC5503196; doi:10.1371/journal.pone.0179827), 2017-07-10
Supplement: pone.0179827.s002.pdf [file pone.0179827.s002.pdf]

**Informed consent****Onderzoek naar sociale factoren en psychische klachten bij Marokkaanse Nederlanders.***Waarom dit onderzoek?*

Uit onderzoek is gebleken dat psychische problemen vaker voorkomen bij migranten en hun kinderen. Ook is gebleken dat factoren in de samenleving daar invloed op hebben. Om hier meer inzicht in te krijgen willen we zoveel mogelijk Marokkaans-Nederlandse mensen vanaf 18 jaar vragen een vragenlijst in te vullen.

*Hoe werkt het?*

De vragenlijst gaat over psychische klachten en sociale factoren. De lijst kan online worden ingevuld en duurt ongeveer 10 minuten. Aan het eind van het onderzoek krijg je een aantal resultaten van jouw vragenlijst te zien. Als hieruit blijkt dat het verstandig kan zijn hulp te zoeken is daarover informatie beschikbaar. De ingevulde vragenlijsten worden geheel anoniem voor onderzoek verwerkt. De gegevens zullen op geen enkele manier naar een bepaalde persoon herleidbaar zijn.

Als je vragen over het onderzoek wilt stellen aan de onderzoeker kan dat via dit e-mail adres:

[m.h.van.de.beek@umcg.nl](mailto:m.h.van.de.beek@umcg.nl) (Madelien van de Beek).

**Voor dit onderzoek is de fase van deelnemers verzamelen afgerond. U kunt niet meer deel uitmaken van de studie. U kunt de vragenlijst wel nog voor uw eigen interesse invullen.**

[Meer weten? klik hier om meer informatie te downloaden.](#)

**Toestemming**

ik ben akkoord met deelname aan de studie

nee, ik doe niet mee

Mijn leeftijd is boven de 18 jaar

ja

nee

Heb je deze vragenlijst al een keer eerder beantwoord?

ja

nee

K10

0% voltooid

De volgende vragen gaan over hoe je je voelde in de afgelopen 30 dagen. Vink per vraag het hokje aan dat het beste omschrijft hoe vaak je dit gevoel hebt.

Gedurende die afgelopen maand, hoe vaak voelde je je...

|                                                       | Hele tijd             | Meestal               | Soms                  | Af en toe             | Nooit                 |
|-------------------------------------------------------|-----------------------|-----------------------|-----------------------|-----------------------|-----------------------|
| ... erg vermoeid zonder duidelijke reden?             | <input type="radio"/> | <input type="radio"/> | <input type="radio"/> | <input type="radio"/> | <input type="radio"/> |
| ... zenuwachtig?                                      | <input type="radio"/> | <input type="radio"/> | <input type="radio"/> | <input type="radio"/> | <input type="radio"/> |
| ... zo zenuwachtig dat niets je tot rust kon brengen? | <input type="radio"/> | <input type="radio"/> | <input type="radio"/> | <input type="radio"/> | <input type="radio"/> |
| ... hopeloos?                                         | <input type="radio"/> | <input type="radio"/> | <input type="radio"/> | <input type="radio"/> | <input type="radio"/> |
| ... rusteloos of ongedurig?                           | <input type="radio"/> | <input type="radio"/> | <input type="radio"/> | <input type="radio"/> | <input type="radio"/> |
| ... zo rusteloos dat je niet meer stil kon zitten?    | <input type="radio"/> | <input type="radio"/> | <input type="radio"/> | <input type="radio"/> | <input type="radio"/> |
| ... somber of depressief?                             | <input type="radio"/> | <input type="radio"/> | <input type="radio"/> | <input type="radio"/> | <input type="radio"/> |
| ... zo somber dat niets je kon opvrolijken?           | <input type="radio"/> | <input type="radio"/> | <input type="radio"/> | <input type="radio"/> | <input type="radio"/> |
| ... zo, dat alles veel moeite kostte?                 | <input type="radio"/> | <input type="radio"/> | <input type="radio"/> | <input type="radio"/> | <input type="radio"/> |
| ... waardeloos?                                       | <input type="radio"/> | <input type="radio"/> | <input type="radio"/> | <input type="radio"/> | <input type="radio"/> |

PQ-16

8% voltooid

Hieronder staan een aantal uitspraken over je gedachten, gevoelens en ervaringen. Lees alsjeblieft eerst elke uitspraak zorgvuldig en vink dan aan of je het ermee 'eens' of 'oneens' bent.

|                                                                                                                           | eens                  | oneens                |
|---------------------------------------------------------------------------------------------------------------------------|-----------------------|-----------------------|
| 1. Ik voel me ongeïnteresseerd in de dingen die ik vroeger leuk vond.                                                     | <input type="radio"/> | <input type="radio"/> |
| 2. Ik ben vaak in een situatie, waarvan ik het gevoel heb dat het precies zo al eerder is gebeurd (déjà vu).              | <input type="radio"/> | <input type="radio"/> |
| 3. Ik ruik of proef soms dingen die anderen niet kunnen ruiken of proeven.                                                | <input type="radio"/> | <input type="radio"/> |
| 4. Ik hoor vaak ongewone geluiden zoals gebonk, getik, gesis, geklap, of gerinkel in mijn oren.                           | <input type="radio"/> | <input type="radio"/> |
| 5. Ik haal wel eens door elkaar of iets dat ik heb meegemaakt echt was of fantasie.                                       | <input type="radio"/> | <input type="radio"/> |
| 6. Wanneer ik iemand aankijk, of mijzelf in de spiegel bekijk, heb ik het gezicht vlak voor mijn ogen zien veranderen.    | <input type="radio"/> | <input type="radio"/> |
| 7. Ik raak buitengewoon ongerust als ik mensen voor het eerst ontmoet.                                                    | <input type="radio"/> | <input type="radio"/> |
| 8. Ik heb dingen gezien die andere mensen blijkbaar niet kunnen zien.                                                     | <input type="radio"/> | <input type="radio"/> |
| 9. Mijn gedachten zijn soms zo sterk dat ik ze bijna kan horen.                                                           | <input type="radio"/> | <input type="radio"/> |
| 10. Ik zie soms speciale betekenissen in advertenties, etalages of in de manier waarop dingen om mij heen zijn opgesteld. | <input type="radio"/> | <input type="radio"/> |
| 11. Soms heb ik het gevoel gehad dat ik niet de baas was over mijn eigen ideeën of gedachten.                             | <input type="radio"/> | <input type="radio"/> |

- 12. Soms voel ik me plotseling afgeleid door geluiden van veraf, die ik gewoonlijk niet bemerk.
- 13. Ik heb dingen gehoord die andere mensen niet horen, zoals stemmen van fluisterende of pratende mensen.
- 14. Ik heb vaak het gevoel dat anderen mij kwaad willen doen.
- 15. Ik heb het gevoel gehad dat er een of andere persoon of kracht om mij heen is, ook al kan ik niemand zien.
- 16. Ik heb het gevoel dat sommige delen van mijn lichaam op een of andere manier veranderd zijn of dat delen van mijn lichaam anders werken dan voorheen.

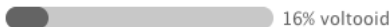

Onderstaande uitspraken heb je met "eens" beantwoord. Wil je per uitspraak aangeven hoeveel last je ervan ondervindt?

|                                                                                                                                                             | geen last             | een beetje last       | nogal wat last        | veel last             |
|-------------------------------------------------------------------------------------------------------------------------------------------------------------|-----------------------|-----------------------|-----------------------|-----------------------|
| » 1. Ik voel me ongeïnteresseerd in de dingen die ik vroeger leuk vond.                                                                                     | <input type="radio"/> | <input type="radio"/> | <input type="radio"/> | <input type="radio"/> |
| » 2. Ik ben vaak in een situatie, waarvan ik het gevoel heb dat het precies zo al eerder is gebeurd (déjà vu).                                              | <input type="radio"/> | <input type="radio"/> | <input type="radio"/> | <input type="radio"/> |
| » 3. Ik ruik of proef soms dingen die anderen niet kunnen ruiken of proeven.                                                                                | <input type="radio"/> | <input type="radio"/> | <input type="radio"/> | <input type="radio"/> |
| » 4. Ik hoor vaak ongewone geluiden zoals gebonk, getik, gesis, geklap, of gerinkel in mijn oren.                                                           | <input type="radio"/> | <input type="radio"/> | <input type="radio"/> | <input type="radio"/> |
| » 5. Ik haal wel eens door elkaar of iets dat ik heb meegemaakt echt was of fantasie.                                                                       | <input type="radio"/> | <input type="radio"/> | <input type="radio"/> | <input type="radio"/> |
| » 6. Wanneer ik iemand aankijk, of mijzelf in de spiegel bekijk, heb ik het gezicht vlak voor mijn ogen zien veranderen.                                    | <input type="radio"/> | <input type="radio"/> | <input type="radio"/> | <input type="radio"/> |
| » 7. Ik raak buitengewoon ongerust als ik mensen voor het eerst ontmoet.                                                                                    | <input type="radio"/> | <input type="radio"/> | <input type="radio"/> | <input type="radio"/> |
| » 8. Ik heb dingen gezien die andere mensen blijkbaar niet kunnen zien.                                                                                     | <input type="radio"/> | <input type="radio"/> | <input type="radio"/> | <input type="radio"/> |
| » 9. Mijn gedachten zijn soms zo sterk dat ik ze bijna kan horen.                                                                                           | <input type="radio"/> | <input type="radio"/> | <input type="radio"/> | <input type="radio"/> |
| » 10. Ik zie soms speciale betekenissen in advertenties, etalages of in de manier waarop dingen om mij heen zijn opgesteld.                                 | <input type="radio"/> | <input type="radio"/> | <input type="radio"/> | <input type="radio"/> |
| » 11. Soms heb ik het gevoel gehad dat ik niet de baas was over mijn eigen ideeën of gedachten.                                                             | <input type="radio"/> | <input type="radio"/> | <input type="radio"/> | <input type="radio"/> |
| » 12. Soms voel ik me plotseling afgeleid door geluiden van veraf, die ik gewoonlijk niet bemerk.                                                           | <input type="radio"/> | <input type="radio"/> | <input type="radio"/> | <input type="radio"/> |
| » 13. Ik heb dingen gehoord die andere mensen niet horen, zoals stemmen van fluisterende of pratende mensen.                                                | <input type="radio"/> | <input type="radio"/> | <input type="radio"/> | <input type="radio"/> |
| » 14. Ik heb vaak het gevoel dat anderen mij kwaad willen doen.                                                                                             | <input type="radio"/> | <input type="radio"/> | <input type="radio"/> | <input type="radio"/> |
| » 15. Ik heb het gevoel gehad dat er een of andere persoon of kracht om mij heen is, ook al kan ik niemand zien.                                            | <input type="radio"/> | <input type="radio"/> | <input type="radio"/> | <input type="radio"/> |
| » 16. Ik heb het gevoel dat sommige delen van mijn lichaam op een of andere manier veranderd zijn of dat delen van mijn lichaam anders werken dan voorheen. | <input type="radio"/> | <input type="radio"/> | <input type="radio"/> | <input type="radio"/> |

Discriminatie schaal

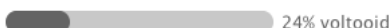

Hoe vaak in je leven werd je gediscrimineerd vanwege je huidskleur, land van herkomst, sekse, leeftijd, godsdienst, uiterlijk, seksuele oriëntatie of andere kenmerken - zoals de volgende voorbeelden:

|                                                                                  | Nooit                 | 1 keer                | wel 2 of 3 keer       | meer dan 4 keer       | ik weet het niet      |
|----------------------------------------------------------------------------------|-----------------------|-----------------------|-----------------------|-----------------------|-----------------------|
| Een leraar raadde u af om hoger onderwijs te proberen                            | <input type="radio"/> | <input type="radio"/> | <input type="radio"/> | <input type="radio"/> | <input type="radio"/> |
| Je kreeg geen baan                                                               | <input type="radio"/> | <input type="radio"/> | <input type="radio"/> | <input type="radio"/> | <input type="radio"/> |
| Je kreeg geen promotie                                                           | <input type="radio"/> | <input type="radio"/> | <input type="radio"/> | <input type="radio"/> | <input type="radio"/> |
| Je werd ontslagen                                                                | <input type="radio"/> | <input type="radio"/> | <input type="radio"/> | <input type="radio"/> | <input type="radio"/> |
| Je kon geen huis huren of kopen in de buurt waar je dat graag wilde              | <input type="radio"/> | <input type="radio"/> | <input type="radio"/> | <input type="radio"/> | <input type="radio"/> |
| Je kon niet blijven wonen omdat de burens je het leven onaangenaam maakten       | <input type="radio"/> | <input type="radio"/> | <input type="radio"/> | <input type="radio"/> | <input type="radio"/> |
| Je werd lastig gevallen door de politie                                          | <input type="radio"/> | <input type="radio"/> | <input type="radio"/> | <input type="radio"/> | <input type="radio"/> |
| De bank gaf je geen lening of hypotheek                                          | <input type="radio"/> | <input type="radio"/> | <input type="radio"/> | <input type="radio"/> | <input type="radio"/> |
| Je kreeg slechte medische zorg                                                   | <input type="radio"/> | <input type="radio"/> | <input type="radio"/> | <input type="radio"/> | <input type="radio"/> |
| Je kreeg slechte service van een loodgieter, automonteur of andere beroepskracht | <input type="radio"/> | <input type="radio"/> | <input type="radio"/> | <input type="radio"/> | <input type="radio"/> |

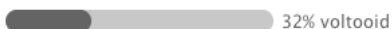

Hoe vaak ervaar je nu één van de volgende typen van discriminatie?

|                                                         | Nooit                 | Zelden                | Soms                  | Vaak                  |
|---------------------------------------------------------|-----------------------|-----------------------|-----------------------|-----------------------|
| Je wordt minder beleefd behandeld dan andere mensen     | <input type="radio"/> | <input type="radio"/> | <input type="radio"/> | <input type="radio"/> |
| Je wordt met minder respect behandeld dan andere mensen | <input type="radio"/> | <input type="radio"/> | <input type="radio"/> | <input type="radio"/> |

- Je wordt minder goed bediend in een winkel of restaurant
- Men doet alsof je dom bent
- Men doet alsof je gevaarlijk bent
- Men doet alsof je oneerlijk bent
- Men doet alsof je minder bent
- Je wordt uitgescholden of beledigd
- Je wordt bedreigd of lastig gevallen

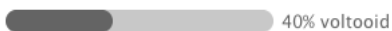

**Wat waren de belangrijkste redenen van de discriminatie die je meemaakte?** (meerdere antwoorden mogelijk)

- Je leeftijd  Een ander aspect van je uiterlijk
- Je sekse  Een lichamelijk gebrek
- Je huidskleur  Je seksuele oriëntatie
- Je land van herkomst of nationaliteit  Een andere reden, namelijk:
- Je religie  Nooit eerder discriminatie meegemaakt
- Je lengte of gewicht

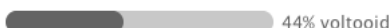

**In welke mate heeft discriminatie je belemmerd in het leiden van een volwaardig en productief leven?**

- In hoge mate
- In enige mate
- Een klein beetje
- Helemaal niet
- Niet van toepassing

**In welke mate is je leven moeilijker geweest ten gevolge van discriminatie?**

- In hoge mate
- In enige mate
- Een klein beetje
- Helemaal niet
- Niet van toepassing

**Social defeat**

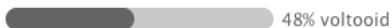

Hieronder vind je een aantal uitspraken die beschrijven hoe mensen tegen zichzelf aankijken. Lees elke uitspraak aandachtig en vink het bolletje aan dat het best beschrijft hoe je je de afgelopen 7 dagen voelde.

|                                                                                                | Nooit                 | Zelden                | Soms                  | Meestal               | Altijd                |
|------------------------------------------------------------------------------------------------|-----------------------|-----------------------|-----------------------|-----------------------|-----------------------|
| 1. Ik heb het gevoel dat ik het gemaakt heb in het leven.                                      | <input type="radio"/> | <input type="radio"/> | <input type="radio"/> | <input type="radio"/> | <input type="radio"/> |
| 2. Ik voel me een succesvol persoon.                                                           | <input type="radio"/> | <input type="radio"/> | <input type="radio"/> | <input type="radio"/> | <input type="radio"/> |
| 3. Ik voel me verslagen door het leven.                                                        | <input type="radio"/> | <input type="radio"/> | <input type="radio"/> | <input type="radio"/> | <input type="radio"/> |
| 4. Ik voel me in oorsprong een winnaar.                                                        | <input type="radio"/> | <input type="radio"/> | <input type="radio"/> | <input type="radio"/> | <input type="radio"/> |
| 5. Ik heb het gevoel dat ik mijn positie in de wereld ben verloren.                            | <input type="radio"/> | <input type="radio"/> | <input type="radio"/> | <input type="radio"/> | <input type="radio"/> |
| 6. Ik heb het gevoel dat het leven me heeft behandeld als een voetveeg.                        | <input type="radio"/> | <input type="radio"/> | <input type="radio"/> | <input type="radio"/> | <input type="radio"/> |
| 7. Ik voel me machteloos.                                                                      | <input type="radio"/> | <input type="radio"/> | <input type="radio"/> | <input type="radio"/> | <input type="radio"/> |
| 8. Ik voel dat het vertrouwen uit me is weggeslagen                                            | <input type="radio"/> | <input type="radio"/> | <input type="radio"/> | <input type="radio"/> | <input type="radio"/> |
| 9. Ik voel me in staat het hoofd te bieden aan wat me overkomt.                                | <input type="radio"/> | <input type="radio"/> | <input type="radio"/> | <input type="radio"/> | <input type="radio"/> |
| 10. Ik heb het gevoel dat ik ben gedaald tot de onderste trede van de maatschappelijke ladder. | <input type="radio"/> | <input type="radio"/> | <input type="radio"/> | <input type="radio"/> | <input type="radio"/> |
| 11. Ik voel me compleet lamgeslagen.                                                           | <input type="radio"/> | <input type="radio"/> | <input type="radio"/> | <input type="radio"/> | <input type="radio"/> |
| 12. Ik voel me een verliezer.                                                                  | <input type="radio"/> | <input type="radio"/> | <input type="radio"/> | <input type="radio"/> | <input type="radio"/> |
| 13. Ik voel dat ik het opgegeven heb.                                                          | <input type="radio"/> | <input type="radio"/> | <input type="radio"/> | <input type="radio"/> | <input type="radio"/> |
| 14. Ik voel me een mislukking.                                                                 | <input type="radio"/> | <input type="radio"/> | <input type="radio"/> | <input type="radio"/> | <input type="radio"/> |
| 15. Ik heb het gevoel dat ik belangrijke slagen in het leven heb verloren.                     | <input type="radio"/> | <input type="radio"/> | <input type="radio"/> | <input type="radio"/> | <input type="radio"/> |
| 16. Ik voel dat er geen strijdlust meer in me zit.                                             | <input type="radio"/> | <input type="radio"/> | <input type="radio"/> | <input type="radio"/> | <input type="radio"/> |

**Social support**

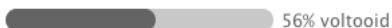

Als je nu ernstige persoonlijke problemen zou hebben, op hoeveel familie, vrienden, kennissen en dergelijke zou je dan echt kunnen

rekenen?

- geen
- 1 of 2
- 3 tot 5
- meer dan 5

Hoeveel betrokkenheid laten mensen je zien bij wat je doet?

- veel betrokkenheid
- enige betrokkenheid
- onzeker
- weinig betrokkenheid
- geen betrokkenheid

Hoe gemakkelijk is het voor je om praktische hulp van burens te krijgen als je die nodig zou hebben?

- heel gemakkelijk
- gemakkelijk
- mogelijk
- moeilijk
- erg moeilijk

Demografische gegevens

 64% voltooid

Wat is je leeftijd?

Wat is je geslacht?

- man
- vrouw

In welk land ben je geboren?

- Nederland
- Marokko
- elders, namelijk:

In welk land is je moeder geboren?

- Nederland
- Marokko
- elders, namelijk:

In welk land is je vader geboren?

- Nederland
- Marokko
- elders, namelijk:

Hoe oud was je toen je naar Nederland verhuisde?

 72% voltooid

Hoe belangrijk is religie voor jou?

- niet belangrijk  enigszins belangrijk  redelijk belangrijk  heel belangrijk

Hoe vaak gebruik je drugs, anders dan alcohol?

- Nooit  Een keer per maand of minder vaak  2-4 keer per maand  2-3 keer per week  4 keer per week of vaker

Gebruik je meer dan één type drugs bij dezelfde gelegenheid?

- Nooit  Een keer per maand of minder vaak  2-4 keer per maand  2-3 keer per week  4 keer per week of vaker

Hoeveel keer neem je drugs op een dag dat je drugs gebruikt?

1-2

3-4

5-6

7 of meer

Welke drugs neem je meestal als je drugs gebruikt? (meerdere antwoorden zijn mogelijk)

 Cannabis (Hasj, Wiet, Space cake ed.) Hallucinogenen (XTC, LSD, Ketamine, MDMA, PCP, Paddo's ed.) Amfetamines (Speed, Ritalin Christal, Pep, Methamfetamine ed.) Oplosmiddelen (Benzine, Lijm, Thinner ed.) Cocaïne Overigen (anabole steroïden, Efedra, GHB, Ether, Herbals ed.) Opiaten (Heroïne, Methadon, Opium ed.)

Ben je eerder in behandeling geweest voor psychische klachten?

 ja nee

Wat was de diagnose of wat waren je klachten?

Gebruik je momenteel medicatie in verband met psychische klachten?

 ja nee

Welke medicatie is dat?

 80% voltooid

Wat zijn de eerste 4 cijfers van je postcode?

(dit geeft informatie over de wijk waarin je woont, wat voor ons onderzoek interessant is. De eerste 4 cijfers van je postcode zijn niet aan een specifiek adres gekoppeld. Je anonimiteit blijft dus gewaarborgd)

Wat is je gemiddelde bruto maandelijkse inkomen?

Wat is je hoogst behaalde diploma?

maak je keuze:

Contact informatie

 88% voltooid

Je zou ons heel erg helpen als je op een later moment (bijvoorbeeld volgend jaar) nog eens mee wilt doen aan een vragenlijst als deze. Mogen we je hiervoor benaderen?

 ja nee

Via welk email adres kunnen we je benaderen?

Wil je kans maken op de waardebon?

 ja nee

 96% voltooid

Kunnen we je daarvoor bereiken op het email adres dat je hiervoor hebt ingevuld:  $\$(q://QID81/ChoiceTextEntryValue)?$

 ja nee, ander email adres:

Geef dan hier het email adres op waarop we je kunnen bereiken als je hebt gewonnen:

Heb je nog overige opmerkingen over de vragenlijst?

Feedback tekst

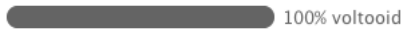

Beste deelnemer,

Heel hartelijk bedankt voor je deelname!

Na elke 50ste deelnemer wordt er een waardebon verloot. De winnaars krijgen hiervan automatisch bericht.

Voor de geïnteresseerden zullen de uitkomsten van het totale onderzoek na afronding op de website ziekofbezeten.nl worden gepubliceerd. Bij overige vragen kun je contact opnemen via: [m.h.van.de.beek@umcg.nl](mailto:m.h.van.de.beek@umcg.nl)

Mede namens de overige onderzoekers, hartelijk dank,  
Madelien van de Beek  
arts onderzoeker UMCG

Hieronder vind je je persoonlijke score op de vragenlijst:

Depressieve klachten en angstklachten

Er waren 10 vragen in de lijst die klachten van depressie en angst meten. De laagst mogelijke score is 10 (helemaal geen klachten), de hoogst mogelijke score is 50 (zeer ernstige klachten).

**Jij hebt de volgende score:  $\{gr://SC6/Score\}$**

Vergelijk je score met de volgende beschrijvingen:

- 10 - 19 geen of minimale klachten
- 20 - 24 milde depressieve en/of angstklachten.
- 22 - 29 matige depressieve en/of angstklachten.
- 30 - 50 ernstige depressieve en/of angstklachten.

Als je een score hebt van boven de 30 en je herkent je in die omschrijving, adviseren wij je hulp te zoeken. Je kunt contact opnemen met je huisarts, of met hulpverleners waarvan de adressen te vinden zijn op de website [www.ziekofbezeten.nl](http://www.ziekofbezeten.nl) onder de knop "hulp&info". Op deze website vind je ook meer informatie over depressie en angst.

Psychotische klachten

Er zijn in de lijst 16 vragen die 'bijzondere' of 'psychotische' ervaringen meten. De laagst mogelijke score is 0 (geen bijzondere ervaringen), de hoogst mogelijke score is 16 (veel bijzondere ervaringen).

**Jij hebt de volgende score:  $\{gr://SC7/Score\}$**

Een score boven de 6 geeft aan dat je meer dan gemiddeld bijzondere/psychotische ervaringen meemaakt. Je hoeft hier niet van te schrikken en dit hoeft niets te betekenen. Als je zelf veel last hebt van deze ervaringen kun je contact opnemen met je huisarts, of met hulpverleners waarvan de adressen te vinden zijn op de website [www.ziekofbezeten.nl](http://www.ziekofbezeten.nl) onder de knop "hulp&info". Op de website vind je ook meer informatie over psychose.

Discriminatie

Op het gedeelte van de vragenlijst dat discriminatie meet, kunnen scores variëren tussen 19 (nooit discriminatie meegemaakt) en 84 (zeer veel ervaring met discriminatie). Hoe hoger jouw score is, hoe vaker je discriminatie hebt meegemaakt. Jouw score geeft inzicht hoe vaak je discriminatie hebt meegemaakt. We kunnen dit nog niet vergelijken met uitkomsten van ander onderzoek. Daarom kunnen we aan de score geen advies koppelen.

**Jij hebt de volgende score:  $\{gr://SC9/Score\}$**

**Wil je nog meer soortgelijke vragen beantwoorden?**

Dit is het einde van het basisgedeelte van de vragenlijst. Als je je email adres hebt ingevuld, kom je in aanmerking voor de waardebon en kun je het onderzoek nu afsluiten. Als je het leuk vindt om nog een aantal vragen te beantwoorden (ongeveer 5 minuten), kan je dat hieronder aangeven. Natuurlijk zou je ons daarmee een grote dienst bewijzen!

- ja, ik ben bereid om nog een aantal vragen in te vullen
- nee, ik heb geen interesse

Social Comparison

In vergelijking met autochtone Nederlanders van mijn leeftijd voel ik mij in het algemeen:

|                           |                       |                                  |
|---------------------------|-----------------------|----------------------------------|
| Inferieur (de mindere)    | <input type="radio"/> | Superieur (de meerdere)          |
| Onbekwaam                 | <input type="radio"/> | Bekwaam                          |
| Onaardig                  | <input type="radio"/> | Aardig                           |
| Buitengesloten            | <input type="radio"/> | Geaccepteerd                     |
| Anders                    | <input type="radio"/> | Hetzelfde                        |
| Ongetalenteerd            | <input type="radio"/> | Getalenteerd                     |
| Zwakker                   | <input type="radio"/> | Sterker                          |
| Onzeker                   | <input type="radio"/> | Zeker                            |
| Ongewenst                 | <input type="radio"/> | Gewenst                          |
| Onaantrekkelijk           | <input type="radio"/> | Aantrekkelijk                    |
| Outsider (buitenstaander) | <input type="radio"/> | Insider (iemand die erbij hoort) |

Acculturation

Hoe belangrijk vind je het om volgens de Marokkaanse normen en waarden te leven?

Erg belangrijk       Belangrijk       Neutraal       Onbelangrijk       Erg onbelangrijk

Hoe belangrijk vind je het om Nederlandse vrienden en kennissen te hebben?

Erg belangrijk       Belangrijk       Neutraal       Onbelangrijk       Erg onbelangrijk

Hoe voel je je van binnen?

- Overwegend Marokkaans
-

- Marokkaans-Nederlands  
 Overwegend Nederlands  
 Geen van beiden

Geef bij de volgende uitspraken je mening.

|                                                            | Helemaal mee oneens   | Redelijk mee oneens   | Neutraal              | Redelijk mee eens     | Helemaal mee eens     |
|------------------------------------------------------------|-----------------------|-----------------------|-----------------------|-----------------------|-----------------------|
| Met vrienden spreek ik veel Nederlands                     | <input type="radio"/> | <input type="radio"/> | <input type="radio"/> | <input type="radio"/> | <input type="radio"/> |
| Met vrienden spreek ik veel Marokkaans                     | <input type="radio"/> | <input type="radio"/> | <input type="radio"/> | <input type="radio"/> | <input type="radio"/> |
| Thuis spreek ik veel Nederlands                            | <input type="radio"/> | <input type="radio"/> | <input type="radio"/> | <input type="radio"/> | <input type="radio"/> |
| Thuis spreek ik veel Marokkaans                            | <input type="radio"/> | <input type="radio"/> | <input type="radio"/> | <input type="radio"/> | <input type="radio"/> |
| Ik heb veel Nederlandse vrienden                           | <input type="radio"/> | <input type="radio"/> | <input type="radio"/> | <input type="radio"/> | <input type="radio"/> |
| Ik heb veel Marokkaanse vrienden in Nederland              | <input type="radio"/> | <input type="radio"/> | <input type="radio"/> | <input type="radio"/> | <input type="radio"/> |
| Ik heb veel Marokkaanse vrienden in Marokko                | <input type="radio"/> | <input type="radio"/> | <input type="radio"/> | <input type="radio"/> | <input type="radio"/> |
| Ik vier Nederlandse feestdagen                             | <input type="radio"/> | <input type="radio"/> | <input type="radio"/> | <input type="radio"/> | <input type="radio"/> |
| Ik vier Marokkaanse feestdagen                             | <input type="radio"/> | <input type="radio"/> | <input type="radio"/> | <input type="radio"/> | <input type="radio"/> |
| Ik vind Nederlandse kleding mooi                           | <input type="radio"/> | <input type="radio"/> | <input type="radio"/> | <input type="radio"/> | <input type="radio"/> |
| Ik vind Marokkaanse kleding mooi                           | <input type="radio"/> | <input type="radio"/> | <input type="radio"/> | <input type="radio"/> | <input type="radio"/> |
| Ik vind het belangrijk om het Nederlandse nieuws te volgen | <input type="radio"/> | <input type="radio"/> | <input type="radio"/> | <input type="radio"/> | <input type="radio"/> |
| Ik vind het belangrijk om het Marokkaanse nieuws te volgen | <input type="radio"/> | <input type="radio"/> | <input type="radio"/> | <input type="radio"/> | <input type="radio"/> |

#### DUDIT

Hier volgen een aantal vragen over drugs. De vragen gaan over de periode van het afgelopen jaar.

|                                                                                                  | Nooit                 | Minder vaak dan een keer per maand | Elke maand            | Elke week             | Dagelijks of bijna dagelijks |
|--------------------------------------------------------------------------------------------------|-----------------------|------------------------------------|-----------------------|-----------------------|------------------------------|
| Hoe vaak ben je zwaar onder invloed van drugs?                                                   | <input type="radio"/> | <input type="radio"/>              | <input type="radio"/> | <input type="radio"/> | <input type="radio"/>        |
| Hoe vaak was je verlangen naar drugs zo sterk dat je dit niet kon weerstaan?                     | <input type="radio"/> | <input type="radio"/>              | <input type="radio"/> | <input type="radio"/> | <input type="radio"/>        |
| Is het voorgekomen dat je niet meer kon stoppen met het gebruik van drugs nadat je was begonnen? | <input type="radio"/> | <input type="radio"/>              | <input type="radio"/> | <input type="radio"/> | <input type="radio"/>        |
| Hoe vaak heb je drugs gebruikt en toen nagelaten iets te doen dat je zou doen?                   | <input type="radio"/> | <input type="radio"/>              | <input type="radio"/> | <input type="radio"/> | <input type="radio"/>        |
| Hoe vaak heb je 's ochtends een drug moeten gebruiken na zwaar druggebruik de dag ervoor?        | <input type="radio"/> | <input type="radio"/>              | <input type="radio"/> | <input type="radio"/> | <input type="radio"/>        |
| Hoe vaak heb je schuldgevoelens of een slecht geweten gehad omdat je drugs gebruikte?            | <input type="radio"/> | <input type="radio"/>              | <input type="radio"/> | <input type="radio"/> | <input type="radio"/>        |

Ben jij, of is iemand anders wel eens gewond geraakt (geestelijk of lichamelijk) omdat je drugs gebruikte?

- Nee  Ja, maar niet in het afgelopen jaar  Ja, in het afgelopen jaar

Heeft een familielid of vriend, een dokter of een verpleegkundige, of iemand anders zich zorgen gemaakt om je druggebruik of tegen je gezegd dat je zou moeten stoppen met het gebruiken van drugs?

- Nee  Ja, maar niet in het afgelopen jaar  Ja, in het afgelopen jaar
